# Supplementary material for: PdxAgy alloy nanoparticles supported on reduced graphene oxide as efficient electrocatalyst for ethanol oxidation in alkaline medium
Source: Royal Society of Chemistry journal article supplement (doi:10.1039/c5ra09653g), 2015-01-01
Supplement: c5ra09653g1.pdf [file c5ra09653g1.pdf]

## **Pd<sub>x</sub>Ag<sub>y</sub> alloy nanoparticles supported on reduced graphene oxide as efficient electrocatalyst for ethanol oxidation in alkaline medium**

Cheng Peng\*, Yongli Hu, Mingrui Liu, Wenke Yang, Yixiong Zheng

### **Supplementary Information**

#### **Experimental Details**

**Catalyst preparation:** GO was prepared from natural graphite (Sinopharm Chemical Reagent Co., Ltd) according to the Hummers method.<sup>1</sup> 0.5 mg mL<sup>-1</sup> GO brown suspension was obtained by ultrasonication in deionized water. In a typical synthesis of Pd<sub>1</sub>Ag<sub>1</sub> catalyst, 1 ml PVP (MW ≈ 50 000, Sinopharm Chemical Reagent Co., Ltd) solution (0.01 mol L<sup>-1</sup>) and 1 ml HCHO (Sinopharm Chemical Reagent Co., Ltd) solution were added into 9.6 ml GO suspension, subsequently, 9.9 ml Pd(NO<sub>3</sub>)<sub>2</sub> (Sinopharm Chemical Reagent Co., Ltd) solution (1.5×10<sup>-3</sup> mol L<sup>-1</sup>) and 0.15 ml AgNO<sub>3</sub> (Sinopharm Chemical Reagent Co., Ltd) solution (0.1 mol L<sup>-1</sup>) were added into the solution while stirring. The mixture was sealed in a Teflon-lined stainless steel autoclave and maintained at 105 °C for 6 h, and cooled to ambient temperature. The resultant product was collected by centrifugation, washed with deionized water and ethanol to remove the residual impurities, and then dried in a vacuum oven at 50 °C for 24h. The obtained catalysts were denoted as Pd<sub>x</sub>Ag<sub>y</sub>/RGO where x to y stands for the nominal atomic ratio of Pd to Ag. For comparison, Pd/RGO catalyst was also prepared with the same procedure. Furthermore, bare RGO was also synthesized under the same conditions in the absence of both Pd(NO<sub>3</sub>)<sub>2</sub> and AgNO<sub>3</sub>.

---

\* Corresponding author: Tel.: +86 592 6162225; Fax: +86 592 6162225  
E-mail address: chengpeng@hqu.edu.cn

**Electrochemical investigation:** All the electrochemical measurements were performed on a CHI660D electrochemical workstation at room temperature. The working electrode was prepared by dropping 15  $\mu\text{L}$  electrocatalyst ink ( $0.6\text{mg}\cdot\text{mL}^{-1}$ ) onto glassy carbon electrode with a micropipette and then dried at room temperature. The ink was prepared by ultrasonically mixing 10  $\mu\text{L}$  electrocatalyst sample in 5  $\mu\text{L}$  Nafion solution (DuPont, 1 wt% in isopropanol). A Pt foil and Hg/HgO electrode were used as the counter and reference electrodes, respectively. The solutions were deaerated by bubbling ultrapure  $\text{N}_2$  for 20 min and protected with a nitrogen atmosphere during the entire experimental procedure.

**Materials characterization:** Structure and morphology of the  $\text{Pd}_x\text{Ag}_y/\text{RGO}$  nanocomposite were investigated using X-ray diffraction (XRD, Bruker D8 advance X-ray diffractometer, Cu-K $\alpha$  radiation,  $\lambda = 0.154059\text{ nm}$  at 40 kV and 40 mA,  $2\theta$  range of  $30\text{-}80^\circ$ , scan rate  $4^\circ\cdot\text{min}^{-1}$ ) and transmission electron microscopy (TEM, JEM100CXII). Composition analysis of the sample was obtained on HITACHI S-3500N scanning electron microscope equipped with an energy-dispersive X-ray spectrometer (EDX, OXFORD 7021).

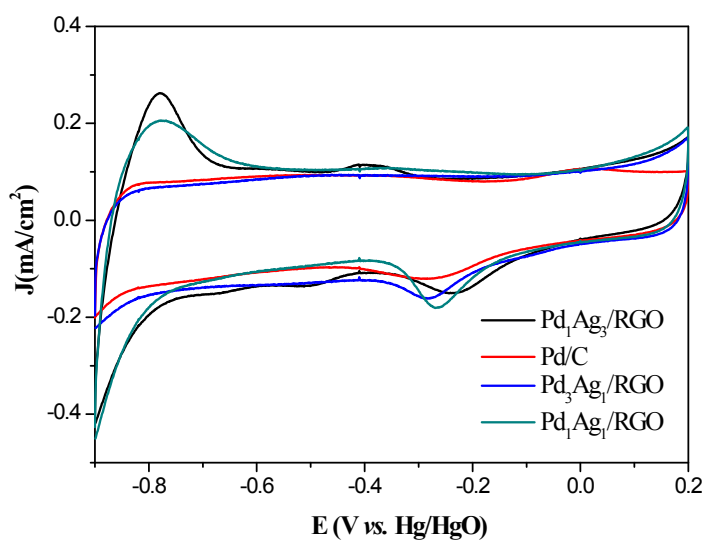

Figure S1 CVs of the Pd<sub>x</sub>Ag<sub>y</sub>/RGO catalysts and commercial Pd/C in 1.0 mol L<sup>-1</sup> KOH solution.

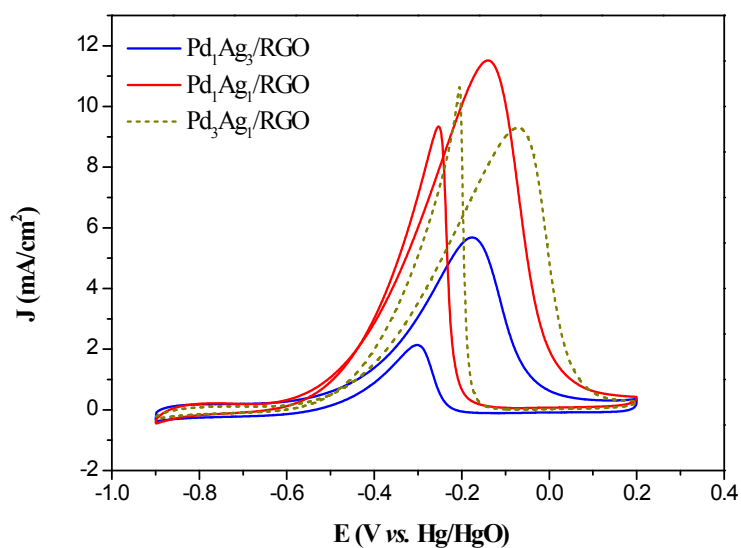

Figure S2 CVs of the Pd<sub>x</sub>Ag<sub>y</sub>/RGO catalysts in 1.0 mol L<sup>-1</sup> KOH solution containing 1.0 mol L<sup>-1</sup> ethanol.

Table S1 The calculated lattice parameter and atomic percentage of Ag in the Pd<sub>x</sub>Ag<sub>y</sub>/RGO catalysts.

| Samples                              | $A_{fcc}$ (Å) | $y_{Ag}$ (at.%) |
|--------------------------------------|---------------|-----------------|
| Pd <sub>1</sub> Ag <sub>3</sub> /RGO | 4.0442        | 81.4            |
| Pd <sub>1</sub> Ag <sub>1</sub> /RGO | 3.9857        | 51.7            |
| Pd <sub>3</sub> Ag <sub>1</sub> /RGO | 3.9302        | 22.3            |

Table S2 Results of the cyclic voltammetric study on the Pd<sub>x</sub>Ag<sub>y</sub>/RGO catalysts.

| Samples                              | $E_s$ (V) | $E_p$ (V) | $J_p$ (mA·cm <sup>-2</sup> ) |
|--------------------------------------|-----------|-----------|------------------------------|
| Pd <sub>1</sub> Ag <sub>3</sub> /RGO | -0.66     | -0.17     | 5.7                          |
| Pd <sub>1</sub> Ag <sub>1</sub> /RGO | -0.68     | -0.14     | 11.5                         |
| Pd <sub>3</sub> Ag <sub>1</sub> /RGO | -0.65     | -0.07     | 9.3                          |

#### Reference

- 1 W. S. Hummers and R. E. Offemen, *J. Am. Chem. Soc.*, 1958,**80**,1339.
